# Supplementary material for: MicroRNA-335/ID4 dysregulation predicts clinical outcome and facilitates leukemogenesis by activating PI3K/Akt signaling pathway in acute myeloid leukemia
Source: publisher site journal article supplement (doi:10.18632/aging.101991), 2019-05-30
Supplement: Supplementary file [file aging-v11i10-101991-supplementary-material-SD1.pdf]

## SUPPLEMENTARY TABLE

Supplementary Table 1. Primers used for RQ-PCR, RQ-MSP and BSP.

|                             | Primer sequences                                |
|-----------------------------|-------------------------------------------------|
| RQ-PCR                      |                                                 |
| MiR-335-Forward             | 5'-TTATAAAGCAATGAGACTGATT-3'                    |
| MiR-335-Reverse             | Manufacturer-provided miScript universal primer |
| U6-Forward                  | 5'-GTGCTCGCTTCGGCAGCACATATAC-3'                 |
| U6-Reverse                  | 5'-AAAATATGGAACGCTTCACGAATTTG-3'                |
| ID4-Forward                 | 5'-CATCCCGCCCAACAAGAAAGTCA-3'                   |
| ID4-Reverse                 | 5'-GCCGGGTCGGTGTGAGCGCAGT-3'                    |
| ABL-Forward                 | 5'-TCCTCCAGCTGTTATCTGGAAGA-3'                   |
| ABL-Reverse                 | 5'-TCCAACGAGCGGCTTCAC-3'                        |
| RQ-MSP                      |                                                 |
| MiR-335-Methylation-Forward | 5'-TCGTGTTTTTGGTGGTTATC-3'                      |
| MiR-335-Methylation-Reverse | 5'-TAACCGCTCGAACTAAAAAAC-3'                     |
| ALU-Forward                 | 5'-TTAGGTATAGTGGTTTATATTTGTAATTTTAGTA-3'        |
| ALU-Reverse                 | 5'-ATTAATAAATAATCTTAAACTCCTAACCTCA-3'           |
| BSP                         |                                                 |
| MiR-335-Bisulfited-Forward  | 5'-GGGGTTTTGTTTTTTAATTGT-3'                     |
| MiR-335-Bisulfited-Reverse  | 5'-AAATACCCCAACTCTTCCTTA-3'                     |

RQ-PCR: real-time quantitative PCR; RQ-MSP: real-time quantitative methylation-specific PCR; BSP: bisulfite sequencing PCR.
